# Supplementary material for: Androgen Receptor Function Links Human Sexual Dimorphism to DNA Methylation
Source: PLoS One. 2013 Sep 4;8(9):e73288. doi: 10.1371/journal.pone.0073288 (PMC3762730; doi:10.1371/journal.pone.0073288)
Supplement: Table S3 — Loci characterized by high variation in DNA methylation patterns in AIS compared to controls. List of genes and CpG loci characterized by a high variation in the DNA methylation pattern in AIS as compared to normal controls (n = 75). (XLS) [file pone.0073288.s006.xls]

## Sheet: table S3
Supplementary table S3: List of genes and CpG loci characterized by a high variation in the DNA methylation pattern in AIS as compared to normal controls (n=75).
SYMBOL	TargetID	F-test	SNP		UCSC_REFGENE_NAME	CHR_37	MAPINFO_37	CHROMOSOME_36	COORDINATE_36	INFINIUM_DESIGN_TYPE	NEXT_BASE	COLOR_CHANNEL	FORWARD_SEQUENCE	STRAND	PROBE_SNPS	PROBE_SNPS_10	METHYL27_LOCI	UCSC_REFGENE_ACCESSION	UCSC_REFGENE_GROUP	UCSC_CPG_ISLANDS_NAME	RELATION_TO_UCSC_CPG_ISLAND	PHANTOM	DMR	ENHANCER	HMM_ISLAND	REGULATORY_FEATURE_NAME	REGULATORY_FEATURE_GROUP	DHS
TMEPAI	cg00138126	6.30947e-05			PMEPA1;PMEPA1;PMEPA1	20	56286697	20	55720103	II			AGCCACAGCCAGCACTAGGTCAGGACCCAGGCCCCGGCCCAGGAGTGGGGCAATACCCAG[CG]TCTACCCCAGATGGCACCCTGCTGTGAACTGGGCGCCCTCAGCCCCTGCCTTGAGGAAGG	F			TRUE	NM_199169;NM_199170;NM_199171	TSS1500;TSS1500;TSS200	chr20:56283891-56285395	S_Shore
TSC22D3	cg00404599	0.00158202			TSC22D3	X	107018431	X	106905087	II			GTTGCGGTTGCAGATGCCCTCGTTGATCAGGTAGCAGGGGTCCCGCAGCACCGGCTCTAG[CG]AATCCTGCCGCATTATGCTGTTGAGCTTGTCGGTATTGAGGTTCTCAAAGACCAGCTTTT	F			TRUE	NM_198057	1stExon	chrX:107018606-107019611	N_Shore				X:106905047-106906480	X:107018416-107018608	Unclassified_Cell_type_specific
LGI1	cg00532335	0.00440128			LGI1	10	95516861	10	95506851	II			TACACGAGTAACATAGCCTATCATTTTCATTTAATTCCAGAATGTCTTTACTATCATCCC[CG]TTTTACAGACAGGAGAATAGATTCAGCAAGTTCACAGCAGACCTGCGTTCTCAAAGCCAG	R			TRUE	NM_005097	TSS1500					TRUE
MXRA5	cg01375994	0.000697564			MXRA5	X	3261645	X	3271645	II			AATGCACATATGAAGTTAAGTAAATGCACATACACACACGCAAAACCAGATCAAGACGCA[CG]CACTGACAGTGGGAAGGTTCGGGAAGAAAGTGGTACAAACCCCAAATTGATTCTTTCCAC	R			TRUE	NM_015419	Body	chrX:3263353-3265347	N_Shore
CCL8	cg01636591	0.00924353			CCL8;CCL8	17	32646156	17	29670269	II			CCCATCCCTGGCCTCCTGTTACCCACAGAGGGGTAGGCCCTTGGCTCTCTTCCACTATGA[CG]TCAGCTTCCATTCTTCCTTTCTTATAGACAATTTTCCATTTCAAGGAAATCAGAGCCCTT	R			TRUE	NM_005623;NM_005623	1stExon;5'UTR
PPM1M	cg02417408	0.00175693			PPM1M;PPM1M	3	52280688	3	52255728	II			TCTCCCTGTGCTGGCTTGGGTCCCTGTGCCCATGGGGACATAGGTGTGTCCCTGGAGGGT[CG]CTTACCATTTCCCGGCCTCAGGATTATCAATGCAGAGAAATCTGAATTCAATGAGGATCA	R			TRUE	NM_144641;NM_001122870	5'UTR;5'UTR	chr3:52279601-52280140	S_Shore			TRUE		3:52278847-52280705	Promoter_Associated
CLDN15	cg02512860	0.000152692			CLDN15	7	100880751	7	100667471	II			CCAGGGAGTCGGTGGCACAGCTAAACCAGAGGTTCTCGAAGATGGTGTTGGTGGTGATGA[CG]TTCCCGTGCACAGTGGACACTCGCCAGTAGCTGTTTGGCAGAGTCACCCCCAGCATCAGC	F			TRUE	NM_014343	1stExon					TRUE
CCL13	cg02706575	0.000271619			CCL13	17	32683054	17	29707167	II			TCTAGCTTTCCCTCTCATTTCCCATAAGATTTTGGTCAAGTTATTTAATCTCTCTGCATC[CG]TTTCCTCTTCTATGAAATGGGCATGATAATAATGGTATGTACCTCCTCAAACTAAATATA	R			TRUE	NM_005408	TSS1500
MGMT	cg03271907	1.41843e-10			MGMT	10	131412643	10	131302633	II			TCCCCCACACCTGATCGTCACAAGCCGTCTAAGACACGTGGTCTAGGGTTTGCTAGTGAT[CG]TCTGTGGGCTTTCCGAGCCTGCGCTGGTTTTGCTGCCACAACCTGAGGTCCGCGGACGTC	R			TRUE	NM_002412	Body						10:131302609-131302807
SCOC	cg04457051	8.23306e-05			SCOC;SCOC	4	141178469	4	141397919	II			CTAGTGTAAATTGTGCTTAGACCAATAACACATTTAAAATTATAGAGCTTTTCATCACTA[CG]GAGATGCTCTTGCCTATGATAGGAACGATGGCTACATCTGAAGCTGAGCAAATTTATCTT	F			TRUE	NM_032547;NM_032547	5'UTR;1stExon	chr4:141173834-141174567	S_Shelf			TRUE
ZC3H11A	cg04498511	0.00948171			ZC3H11A	1	203768441	1	202035064	II			TTTTACCCATGTGCCATGCTTCCTGCATTGTTTAAATATGGTCATTCAGGACTTTTTCTG[CG]AGCACAAAAGCATTGAGAATATGTTAGTGGCTGCCAGGAAAACTTGTCATCATTTTAGTC	F			TRUE	NM_014827	5'UTR	chr1:203764568-203765293	S_Shelf
C18orf22	cg04727522	0.000956049			C18orf22	18	77793182	18	75894170	II			AAATGATTAGAGACTTGTCTCGTCGTTTTCTTCGATTGACAATATATACACACATACATA[CG]CATACACACACACATATATACGCGCACGCACATGCACACATATACATGTCCACACACATG	R			TRUE	NM_024805	TSS1500	chr18:77793336-77793925	N_Shore					18:77793119-77795128	Promoter_Associated
MRPS21	cg05191071	0.00167349			na	na	na	na	na	na	na	na	na	na	na	na	na	na	na	na	na	na	na	na	na	na	na	na
TAGAP	cg05262335	0.0001173			TAGAP;TAGAP;TAGAP;TAGAP;TAGAP;TAGAP	6	159466062	6	159386050	II			TGGGAGAGAGAGAGACCGAGCCGGTCTCCCTTCACATGCTCTGCATTATAAGCGAAGGGG[CG]GGCAGGTGGAAATTCAGAATATTACAGAGACCGGAAAGAACATCATGGGCTGTCACACGG	F			TRUE	NM_152133;NM_152133;NM_054114;NM_138810;NM_138810;NM_054114	1stExon;5'UTR;5'UTR;1stExon;5'UTR;1stExon							6:159465693-159466558	Promoter_Associated
AMBP	cg06630567	9.51062e-05			AMBP	9	116840435	9	115880256	II			GAGAGATATTGAAGTTTTCCTGCACTTGGATGTTGTCGGGCGGCGTTGGCACAGGGCCAG[CG]CTCACCGCCAGGCAGGCGCTCAGCAGCAAGAGCAGGGCCCCGAGGCTCCTCATGGCTATG	R			TRUE	NM_001633	1stExon
GPRC5A	cg06776256	0.0098566			GPRC5A	12	13043728	12	12934995	II			AGTGGAGGGAGGGGAAACCAGGCACCAAAGCAAATTCCTTCATTTCATAATTTCATCTGG[CG]CCCCCGTTCAATCAGCCTGCATTGTCGAGGCTTTAGGAGAGGCAGTTAGGAAAGGAGAGA	R			TRUE	NM_003979	TSS1500	chr12:13044042-13044667	N_Shore					12:13043698-13044833	Unclassified
CAMK4	cg06822995	0.0488525			CAMK4	5	110559431	5	110587330	II			CAGCATTTATTCCAACTGAAGACTTCACTCAAAGGTGAGTCAGGTCAGTGTGGACCTGGG[CG]CTTCCTTTTCCTCCAGCTCTCACTGGGTCCAGGCACAGGAGCCCTGAGGGATCGGCGACC	R			TRUE	NM_001744	TSS1500	chr5:110559569-110560446	N_Shore							TRUE
DPPA3	cg06872381	0.000492224			DPPA3	12	7864076	12	7755343	II			ACCTATAGTTTACGTCAGTTCTTTGACCATTCGTTGGAGCTCCGGTTTTCAGCCTCTTTC[CG]GGCTACCTGGTAGCAATTTGAGGCTCTGTCATCAGTTTCTGCTACGTTTCAAAGATCCTG	F			TRUE	NM_199286	TSS200					TRUE
SLURP1	cg07441143	0.0293362			SLURP1	8	143824001	8	143821003	II			GCAGCTGGCAGGAACATGGCAGACGGGCAGGGAGCTGGATCTGGGAGCTCTGTCTGAGGA[CG]ATGGCCAGGCCTCTGCTTGCACACCTCCAACACTGGGGAACTCACTGTTCCTCAGCCATG	F			TRUE	NM_020427	TSS200	chr8:143820468-143821310	S_Shelf
GNRH2	cg07549715	0.000369144			GNRH2;GNRH2;GNRH2	20	3024204	20	2972204	II			ATGGACTGGATGCTCTGGGAAGCGGGTTGGGTGGTGAGCTTCTCTCTTCCCCTCTGAAGA[CG]TCACTGGAGTCTGGGGGTGGAGCTGCCTGGTCTATAAATCCTGGGGCCATCAGGCTAGGG	R			TRUE	NM_178332;NM_001501;NM_178331	TSS200;TSS200;TSS200	chr20:3026277-3027468	N_Shelf
LOC201895	cg08009831	0.0013565			na	na	na	na	na	na	na	na	na	na	na	na	na	na	na	na	na	na	na	na	na	na	na	na
SLC1A2	cg08258650	1.78296e-06			SLC1A2	11	35441900	11	35398476	II			GACAGATGGGCTTGTGCAAGGGAGAGTTCGAGCCTTCCGGACGCCTTTGCATAAAAATGA[CG]AGACCTGTGCAGCTTTGATTATCTCTGGAATACTGCAGGAACCTAGGGTCCCACTACTTG	F			TRUE	NM_004171	TSS1500	chr11:35440375-35441882	S_Shore		RDMR		11:35396952-35398718
SRPX	cg08480367	8.97713e-06			SRPX;SRPX;SRPX;SRPX	X	38080608	X	37965552	II			CCTCACGACCATGCCCCAAGTTCGCTATTACCATGTCCACTTTCTCCAATAAGACACCGA[CG]CTTAGAAACTTGCCCAGATTCACCCCCGTTACTGGCAGAGCAGGGACTGGAACTTAGGTG	F			TRUE	NM_001170752;NM_006307;NM_001170751;NM_001170750	TSS1500;TSS1500;TSS1500;TSS1500	chrX:38079691-38080150	S_Shore				X:37964214-37965553
MAP1A	cg08880153	1.86915e-05			MAP1A	15	43808806	15	41596098	II			GCATCCTCGGGTTGGAAGGAAGTGCTACCACTCTCCAGATTCTTCCTTTGAGTCCTAGAG[CG]CTTTACTAAATCTGAGATGGAGGTAGAGACTAAGGGAAACAGGATCAACATTAGAAAGAT	F			TRUE	NM_002373	TSS1500
TRIM40	cg09196959	0.0063491			TRIM40	6	30104440	6	30212419	II			GTTTATAGTGGTCTGGCTTTTGGCCATGACAATGACACCTTGCCCTTTTAATTTGGGGCC[CG]TGCAAATATTCACTGAAAGCTGTCAAGAGGAAAACAGAATTGGTTATTGAATCACTTGCT	R			TRUE	NM_138700	TSS200
IL16	cg09837803	0.00297369			na	na	na	na	na	na	na	na	na	na	na	na	na	na	na	na	na	na	na	na	na	na	na	na
DEFA1	cg10758292	0.0185293			na	na	na	na	na	na	na	na	na	na	na	na	na	na	na	na	na	na	na	na	na	na	na	na
FLJ45964	cg10832945	0.024881			na	na	na	na	na	na	na	na	na	na	na	na	na	na	na	na	na	na	na	na	na	na	na	na
MGC40178	cg10923408	0.0183087			C13orf26	13	31506710	13	30404710	II			AAAGCCACATTTCTTTGCTCTCTGCACCCCATTCCCGCGCCGGCCAGGTTAAGCCTCCTG[CG]TGGCCAGCACCCCTTGGCAGGGGCAGAACTCCCTGGAACCCGATCCTTGTCTCCATGGCG	F			TRUE	NM_152325	TSS200
KRT6A	cg11471401	9.32396e-06			KRT6A	12	52888480	12	51174747	II			CCTGTCTAAAGGAGGTGCTAACTCAGCGTCTGGCAAGAACGAGATACCTTCTCAAGACAA[CG]GAAGCAGCTCCCCTCCCTCCACCCTGGTTGCACAATGGTTGACCAAGAATGTGCTTCCAC	R			TRUE	NM_005554	TSS1500
SEMA3B	cg12069309	0.00145277			SEMA3B;SEMA3B	3	50312913	3	50287917	I	C	Grn	GGGGTCGCGTGCACGCGCTTCCAGCCCAGTGCCAAGAGGTGGGCGGGGTCGGGGTTGGGC[CG]CCGGGAGGGAGGCGAAGGGTCTTTCACTGCCCGGGGCTGAAAGAAGGGCTCACAGAAGAT	R			TRUE	NM_001005914;NM_004636	Body;Body	chr3:50312687-50314419	Island			TRUE	3:50287389-50289423	3:50312707-50313534	Unclassified_Cell_type_specific
PYCARD	cg12100791	0.0186562			PYCARD;PYCARD	16	31214417	16	31121918	II			GCTGGCTCTCACTGGGTTTATTGGAGCACCTAGGCTTAGAACCTCGGATTTCTAGAACCC[CG]AAACCTCCGCGGTTCCCCGAACCTTAGGATCCTCTCCCACATGTCGTAGAATCTTGGAAT	R			TRUE	NM_013258;NM_145182	TSS200;TSS200	chr16:31213566-31214287	S_Shore				16:31121068-31121965	16:31212787-31214820	Promoter_Associated
HOXA5	cg12128839	0.000168787			HOXA5	7	27183436	7	27149961	II			GAATCACGTGCTTTTGTTGTCCAGTCGTAAATCCTGCCTGATGACCTCTAGAGGTAAACT[CG]TGCACTAATAGGGGAGTTGGGTGGAGGCGAGGGGGGTGGCGCGCGCGCCCCGGGCGCGTG	R			TRUE	NM_019102	TSS200	chr7:27182613-27185562	Island				7:27149871-27150476	7:27182652-27184498	Unclassified
SYNPO	cg12172720	2.53699e-05			SYNPO;SYNPO;SYNPO;SYNPO	5	150019603	5	149999796	II			CAGCTCTTCCTCTGGCTGGCTGTGTGACCTTGAGCAAGTTGCTGCACCCCTCTGAGCCAG[CG]TCTTCTCTAATATGGAGATGAGGATAGTGCTGGCCTCATGGGTTGCTGTGGAAGTAAGTG	R			TRUE	NM_001109974;NM_001166208;NM_001166209;NM_007286	TSS1500;Body;Body;TSS1500
WDR44	cg13674559	0.0151886			WDR44	X	117479752	X	117363780	II			CGTTTCCCGAGAGTATTTCTTTACAAGTAAAAGACCGACTCAAAATCACCCCTCTCAAAA[CG]CGTCTCTTTGGAACTGCAGAGTTAGGGAGTAAGACTTTCTGCCTGACCCCACCTACGTCG	R			TRUE	NM_019045	TSS1500	chrX:117479565-117480488	Island				X:117363780-117364877	X:117479159-117481066	Promoter_Associated
FUT1	cg13881341	0.000709008			FGF21;FUT1	19	49259215	19	53951027	II			AGTCTGGCCCTCCATTGAAAGGACCCCAGGTTACATCATCCATTCAGGCTGCCCTTGCCA[CG]ATGGAATTCTGTAGCTCCTGCCAAATGGGTCAAATATCATGGTTCAGGCGCAGGGAGGGT	F			TRUE	NM_019113;NM_000148	TSS200;TSS1500	chr19:49255778-49256495	S_Shelf			TRUE
PLAC1	cg14674582	0.0150642			PLAC1	X	133792282	X	133619948	II			CCAGGGTCTTCCTGAATCGTCATACACCATGCTGGCTGCCAAGGCATAAGGTGACCTAAG[CG]AAGCTTTCACACAGGCCATGTGCACAGTCATAAAATCTCGAGAGAATGTGGCAACAGAGA	F			TRUE	NM_021796	5'UTR
FMO2	cg14721213	0.00283744			FMO2	1	171154612	1	169421236	II			CTGGAAATTTGGCTCACATCCCTAGTATGTTACTGCATAGTCTGGCTTTGTTCAATGGGT[CG]CTTTTAAATATTAAAGCTAGATGTAAGCAAGGTTTGCAACAAAGTCCATAAGAAACTCAG	R			TRUE	NM_001460	5'UTR					TRUE
SUSD1	cg14862827	5.99483e-05			na	na	na	na	na	na	na	na	na	na	na	na	na	na	na	na	na	na	na	na	na	na	na	na
CROT	cg15350036	0.00127694			CROT;CROT;CROT;TP53TG1	7	86973677	7	86811613	II			TTTAGTTACTCAATTTAAAAACTTTATCTTGTAAGCAAACTTTAACATCATCCAGAGCAT[CG]CACTTATATATGAAAGAAAAAGTTCTTTATCACACCTTCAGAAATTACAACTACAAATTC	R			TRUE	NM_021151;NR_026585;NM_001143935;NR_015381	TSS1500;TSS1500;TSS1500;Body	chr7:86974740-86975088	N_Shore
FLJ35801	cg15425811	0.0228937			C22orf27	22	31318181	22	29648181	II			GCAGTTACTGGAGTAGGAAGAGGCCTCGGAGAATCCCTGGAAGCATCTACCTAAAAGACG[CG]AGGAAACCCCCAAAGGCCACAGGCACCTGCACCAAACCCTGAGTGCCGCAGGAAGCTCGC	F	rs77963851		TRUE	NR_026920	TSS200	chr22:31318228-31318489	N_Shore			TRUE		22:31318029-31318574	Unclassified_Cell_type_specific
AGPAT2	cg15720535	9.22117e-06			AGPAT2;AGPAT2	9	139582585	9	138702406	I	T	Red	AGAAGTAGCCTTGTCACCAGGGACGCTCCGGGGGCAGGCGAGGTGGGTGTCAGGTGGCGG[CG]TTCACATCCGCTTGGCAGCACGGCCAGCGTGGCAGGGCAAGGTGCAGCTGGGACAAGGGC	R			TRUE	NM_006412;NM_001012727	TSS1500;TSS1500	chr9:139580969-139582615	Island				9:138700862-138702436
SLC17A4	cg15916061	0.100453			SLC17A4	6	25754219	6	25862198	II			AAACCAGAGAAAAGATAAGGATTCAGCAAAACGTATTGACAAGGAACAACCAATGAGACA[CG]AGGAAAATCAGATCTGAATGAATTAAATGAAACAAGGCATCAAGAAGGAACGAGTGGTGG	F			TRUE	NM_005495	TSS1500
MGMT	cg16698623	2.71459e-06			MGMT	10	131412968	10	131302958	II			CCATTGCACTTGGTCTCTTGACCTCGATGTTGCCCATGAGCAGTGAAGGATGACTTTTGA[CG]AGCCATGTCAGATGTGACAGGCAATCTAGTTGGCTTGAGTGGAAATGTGCTGTACAAGTT	F			TRUE	NM_002412	Body
ENTPD3	cg17200465	0.0313745			ENTPD3	3	40428508	3	40403512	II			GACCTGGAGGGGGACAGAAGGCTCTCTGGGCAGGCAGGGCCGGTCTTTTGGCAAGAGGCG[CG]CTCTCTCTCCCTTCCCCTTCCATCGAGGGCTGGGTGTGAAGGTGAGAGCAATCAGAAAAG	R			TRUE	NM_001248	TSS200	chr3:40428651-40429015	N_Shore			TRUE				TRUE
TSPAN16	cg17496921	0.00127588			TSPAN16	19	11406993	19	11267993	II			GATGTTAACTTAAATGTTCAGGGTGCCCCAGTCTGTTCAGCATGGCTGAAATCCACACTC[CG]TATTCTTCCTTGAAGAAACTGTTATCTTTACTCAATGGCTTCGTGGCTGTAAGTATGTCA	R			TRUE	NM_012466	1stExon	chr19:11404512-11404776	S_Shelf
MGMT	cg17686260	1.56832e-05			MGMT	10	131412764	10	131302754	II			CCCTGTGCTCGCTATGACTTCTTTGTGTGAGACTGTCAGAGTGTGTTCCTGGCCCTGACA[CG]TGCTCGGCGGCTGGTTTTTCTCCTTCAGATCAGCGGCCTTGGACAGCTTTCGCTTCTTTG	R		rs77600984	TRUE	NM_002412	Body						10:131302609-131302807
C16orf30	cg17706173	6.1976e-06			IFT140	16	1582581	16	1522582	II			GGCAGCTCTCGGGACCGCCCTGAGCCAGGGCCCAAGCACGGGCAGTGCAAGGACAGGAAA[CG]GTCAAAGCTCTGCTGTTACCACAGGCTGGGAACAGGACTCTCTGTCCCAGCACTGTCTTG	F			TRUE	NM_014714	Body	chr16:1583809-1584641	N_Shore
TCTEX1D1	cg17819635	5.05321e-05			TCTEX1D1	1	67217673	1	66990261	II			ATCTCAATTTTCCAAATCCTTTAAAGGGAAAACATTCCTTTCTTGACAGAGTTATTGGGA[CG]ACTAAATCCCAATGTTTGTCGGTATCTGGGGTATCTGGCCAATGTAAGTGCTCATTTACC	F			TRUE	NM_152665	TSS1500	chr1:67218079-67218293	N_Shore			TRUE
KCNQ1	cg17820828	0.00188697			KCNQ1;KCNQ1	11	2813298	11	2769874	I	C	Grn	GGGGCCGAGGCGCGCTGGGCTGTTTGGGTTGGCAACCTGAGCCCTCCCCACCCCGTTCCG[CG]TCCGCTGCTTCCCGCCCTGGTCCGGCGCTTCCATTCATGCCTTCCCGGGTCCCTCCGCCA	F	rs61869763		TRUE	NM_000218;NM_181798	Body;Body	chr11:2812415-2813396	Island				11:2769023-2769970	11:2812612-2813632	Unclassified_Cell_type_specific
CDC2L2	cg18241160	3.90561e-05			na	na	na	na	na	na	na	na	na	na	na	na	na	na	na	na	na	na	na	na	na	na	na	na
MGMT	cg18488970	8.17407e-05			na	na	na	na	na	na	na	na	na	na	na	na	na	na	na	na	na	na	na	na	na	na	na	na
CAPN3	cg19170321	0.00241356			GANC;CAPN3;CAPN3;CAPN3;CAPN3	15	42640316	15	40427608	II			TTCTTATATGAATACTGCTTCCCTGAGCGTGCTGCTCTGTTACAGATTCCAGTGTTTCAG[CG]AGGTGGAAGTGTGATACCAATAAAGACAACTGTAGGAAAATCCACAGGCTGGATGACTGA	F			TRUE	NM_198141;NR_027911;NM_212465;NM_212465;NR_027912	Body;Body;5'UTR;1stExon;Body					TRUE
ALDH1A3	cg19224278	1.55049e-07			ALDH1A3	15	101419017	15	99236540	II			TCCGTGCCTCCGGTCTTTGTTCCAGCGACCTGAGGAATGGCATGCATCAGAAGCCGCTTC[CG]TGTCTCAGATGGGGCCTGGGTCAAGTCCTGGGAGTTGATGGAGCGTTTCCCAAATCGCAA	R			TRUE	NM_000693	TSS1500	chr15:101419261-101421133	N_Shore		RDMR			15:101418944-101419037	Unclassified_Cell_type_specific
NGEF	cg19485804	0.000207921			NGEF	2	233878714	2	233586958	II			TACCATCATTTGCCAAGTTTAATTGCTACATCATCCATCTTTATATAAAACTCAAATCAG[CG]TTTGTTTTAGCTATCTGTTCTGGAAACAAATTAACTCAAAGTGTGTGGCTTGAAATAACA	R			TRUE	NM_019850	TSS1500
MFRP	cg19560971	0.00038736			MFRP;C1QTNF5	11	119218238	11	118723448	II			GTAGAATGTCTGGGCAAGAGGGCTACATGCAGTTTCTCTCCTTTCATAACTATGAGGTAG[CG]TCACCATTTTACAAATGCTGGTGCTGGCCTCTGAGAGGTTATGTCACTTTCCCAAGGTCA	F	rs76918238		TRUE	NM_031433;NM_015645	TSS1500;TSS1500					TRUE				TRUE
P2RXL1	cg19592945	0.0002514			P2RX6;MGC16703;P2RX6	22	21369610	22	19699610	II			GTATGTGATGACCAGGAACTGGCGGGTGGGCGCCCTGCAGAGGCTGCTGCAGTTTGGGAT[CG]TGGTCTATGTGGTAGGGTAAGAGAGAAGAGCTTTTGGCCAGGCTGGAGGGGCAAGGGAAG	R			TRUE	NM_005446;NR_003608;NM_001159554	1stExon;TSS1500;Body	chr22:21368197-21368771	S_Shore			TRUE
KSP37	cg19712821	1.52077e-05			FGFBP2	4	15965016	4	15574114	II			CCACAAGCAAAGGGAATGGTTTTCCTGAGTGCCTCAGAGAGATCTGCCCCAGCCCTGTCA[CG]CACAAAGCGCCACACACAGCTTTGGGGCTGAGGGTTTTACAGTTTTCCAACCACAGGGTG	F			TRUE	NM_031950	TSS200							4:15964778-15965427	Unclassified
CA2	cg19876444	0.000380642			na	na	na	na	na	na	na	na	na	na	na	na	na	na	na	na	na	na	na	na	na	na	na	na
FAM101A	cg21453309	4.84035e-05			FAM101A	12	124774055	12	123340008	II			CGTTAGAACAGCTTTCATTACTCACTGAAAGCACTGGGAATCTGGAGGCTGTCCTGGACA[CG]CACATACAAATGGCAGCAGAACGTATGCCCAGGTCAAAGGCACTTTGAATTCATTTTGTC	F	rs77823368		TRUE	NM_181709	5'UTR					TRUE	12:123339794-123340032	12:124773542-124774191	Unclassified_Cell_type_specific
C21orf124	cg21755709	2.60388e-06	yes		PDXK	21	45149398	21	43973826	II			TCTGCAGCCCAGTGAGGAGTTCACAGAGTGGTGGGCGACCCAGCAGCCAGGGGCATCAGC[CG]TGGGAGTGGGACGCTCCGGGAGTCTGAGCTGCATCCTGTGGGCGCAGCAGACGCTCAAGG	R			TRUE	NM_003681	Body	chr21:45148454-45149262	S_Shore					21:45148017-45149547	Promoter_Associated
MGAT1	cg21898046	0.000190408			MGAT1;MGAT1;MGAT1;MGAT1;MGAT1	5	180231026	5	180163632	II			CTGCGGCCTGTGGTTACTGACTGACTGCTCACTAACTTGTTTCTACATGAAACCACGAAT[CG]TGCAGGGTTCTAGAGAAACAAAGGGCCGCGCGCACCCGCAGGCCCCTGCGTGGAGGCGAG	R			TRUE	NM_001114618;NM_001114620;NM_002406;NM_001114617;NM_001114619	5'UTR;TSS200;TSS1500;5'UTR;TSS200	chr5:180229375-180230147	S_Shore				5:180161982-180164097	5:180230758-180231301	Promoter_Associated
JDP2	cg22143352	0.00203692			JDP2;JDP2;JDP2;JDP2	14	75897841	14	74967594	II			GTGTGTCTGTATTAGGTGTGGTAGTGTTAACCCCTGCCAGCCACCAAGGACCAGAGCTGG[CG]TGAAGTAGAAGGGAAAATAGAAAGCTTGTCCAATGGTTGTACGCTCCCAGCTTCCTCTTG	R			TRUE	NM_001135048;NM_130469;NM_001135047;NM_001135049	5'UTR;5'UTR;5'UTR;TSS1500	chr14:75894308-75895469	S_Shelf
WISP1	cg22637941	2.57668e-14			WISP1;WISP1	8	134203841	8	134273023	II			TCGCCTAACCTGGCTGTGTGGCCTCGGGTGGGTCACTCACCCTCCAGGAGCAGCGTAAAG[CG]ACGAAGTTGTTAGGTGACTTCTAGAGTCTCTGAGTTTGAAAACTCCAAGACTCCAAGCAT	F			TRUE	NM_003882;NM_080838	Body;Body					TRUE
C1orf107	cg23166289	0.0133037			C1orf107	1	210001082	1	208067705	II			TTTTTATTGCAGTATACTGTAAAGTCACTGCATTCGACTATCTCCGCTACTACACATTTA[CG]CAGACTGATTTCCATAACCAAAACACAAGCACAAAGCTCATGCCCCCGACTCACGCAACC	R			TRUE	NM_014388	TSS1500	chr1:210001129-210001428	N_Shore					1:210000917-210001809	Promoter_Associated	TRUE
NR1H4	cg23256150	9.68636e-06			NR1H4;NR1H4	12	100867758	12	99391889	II			CTCATTGTCTCCCCGACTTATCCTAATGCGAAATTGGATTCTGAGCATTTGTAGCAAAAT[CG]CTGGGATCTGGAGAGGAAGACTCAGTCCAGAATCCTCCCAGGGCCTTGAAAGTCCATCTC	R			TRUE	NM_005123;NM_005123	5'UTR;1stExon
PYGO1	cg23412777	2.80503e-06			PYGO1	15	55881706	15	53668998	II			CAGAGAACAGATGTTAACATGAAGCCAATGTACAGCCTCAACAGCTGCATACCAGACAAT[CG]CCACAGCGGCTGATCGTCGTTAAGACATAGCGTGGCCGGAGGCAAATGTTACCCTTTATC	R		rs76717159	TRUE	NM_015617	TSS1500	chr15:55879792-55881228	S_Shore				15:53668891-53669018
C8orf46	cg23704362	2.0497e-05			C8orf46;C8orf46	8	67405742	8	67568296	II			AAAAAAAAAAAAAAAAAAAAGGACAGATGGGTTTAGAAAATGTTGCAGTGAAGACTGGAA[CG]AGATGAGCTCATAGCACCAGCCTGTCTTTTGTGGACCCGCACAATGATCCCTGAGCCAGA	F			TRUE	NM_152765;NM_152765	1stExon;5'UTR
TTC12	cg24264506	9.40383e-24			na	na	na	na	na	na	na	na	na	na	na	na	na	na	na	na	na	na	na	na	na	na	na	na
C3orf22	cg24389347	0.000153443			C3orf22;C3orf22	3	126277693	3	127760383	II			TGCCCAGAGCTTCCAGCCAGAAAGGACAAGCTGCAGGACCCTGTGGGCTGGCTTATGTGA[CG]CCAGGCAGACTGAAGCTGGCCATGGTCCCAGCTGCCACATTACCACAGGAACAGCAGCCC	F			TRUE	NM_152533;NM_152533	1stExon;5'UTR
ZFP41	cg24641352	0.00209667			ZFP41	8	144328078	8	144399453	II			GAGGACCCAGCTAAGCCTGGCCTTCTGGCCCACAGAAGCCTTGAGATAATAGGCGGATGT[CG]TTTTAGGACACCCAATTTGCGGTACGTAGGGAACTAACACGCGGGGCTCTGGCGGGCCTG	R			TRUE	NM_173832	TSS1500	chr8:144328103-144329545	N_Shore
KRTHB2	cg24926042	0.00132677			KRT82	12	52799999	12	51086266	II			CCCGGGCCGGCATGGCCCCTTGCTCACTGCATAGTGGGTGACCATCCGGGGCATGACAGC[CG]AGTATGAGCTGAAACTCTGACTGCCACACCTGGAGCCTGGCTGGAAAGAGTGGTACGACA	F	rs75818265		TRUE	NM_033033	1stExon
FAM101A	cg25463779	0.0178464			FAM101A	12	124773236	12	123339189	II			ACGAAATGCAATGTGTGTGATCGCTTCTCTGCCTTTTGGCTAAGATCAAGTGAAATGCAA[CG]TGTGTTTGAGCCCTGGGTTGAGAAAGAAAACAGCTTTAAAGGACATTGTTGGGAAAATTG	F			TRUE	NM_181709	TSS1500
AATF	cg25742201	0.000764635			AATF	17	35306863	17	32380976	II			GAGCCAGAGAGTCTGCTAGCAAGTTGGAAGTTAGCTTTGAGGATGCCCTTTCTGGTATTG[CG]TTAGAAAGGAGGAGAAGAAAGTCGCATGTTTTTAATTCAGGTTGCCCTTCAAAACTAAGT	F		rs79615888	TRUE	NM_012138	Body	chr17:35305758-35306757	S_Shore
ANKMY2	cg25778479	7.23479e-06			BZW2;BZW2;ANKMY2;BZW2	7	16686771	7	16653296	II			ATAGGTAGATGGGGGTAAATACAAGTGTGTATTTCAGAATAAGATTTGCTTGCTAAAATG[CG]GGAATCAGTCATTTCTCCAGGGTGCAGATTTATATTTACATCATCAATGAAAGTTTCTTT	F			TRUE	NR_027624;NM_001159767;NM_020319;NM_014038	Body;5'UTR;TSS1500;5'UTR	chr7:16684665-16684907	S_Shore
LZTS1	cg26917999	0.00828577	yes		LZTS1	8	20112890	8	20157170	II			GAAGAAGACACAAGACAGAAGTCAGCGTGGGTGGGAGTGGTCACAGCACAGTGCTGATTC[CG]ACTTCCAGATCTGGGCAGTAGAGAAACACATGTCAGAGCCCAGCACTGTCTCCACCACCG	F			TRUE	NM_021020	TSS200
NDST4	cg27063986	0.00342549			NDST4	4	116035232	4	116254681	II			AGTGGGATGTTACACATGAATACATTCCAACAGAAGCTAATTCAGCGATGGGCTGCATTC[CG]CTCACACCGCGGTGATTGATTAGATGCTCCTTGAAGATTTGCATAATCTTTCATTGTACA	R			TRUE	NM_022569	TSS1500
FLJ20184	cg27126442	0.00327114			FLJ20184;FLJ20184	4	106473806	4	106693255	II			TGGAGCTCTGGGACTTCGTAGAGGTGGTGGCAGTCACAGCCAGGTAACCCTGGAGTGAAG[CG]GTTTAGTTAGAAGGGAGCAGATAAACTCGTCACTCTAGTAGCTTTAACCCTCACCCTGAG	F			TRUE	NM_017700;NM_017700	5'UTR;1stExon
MMP11	cg27532722	2.32712e-06			MMP11	22	24115568	22	22445568	II			TTCATCGCAGGGACAAAGCCGAGCAGATCCCAGGCAGGTGTCAGCCTGCAGGTGTGTGGC[CG]CAGTTAGTACACCTCCAGGTGTGCGGTGGGATGAAGGATAAAGGGAGAAGGGAGGGCAGC	R			TRUE	NM_005940	Body	chr22:24114875-24115467	S_Shore			TRUE		22:24114634-24115691	Unclassified	TRUE
